# Supplementary material for: Transient crystallisation of rare earth carbonates during the hydrothermal oxidation of siderite
Source: Royal Society of Chemistry journal article supplement (doi:10.1039/d4ra05212a), 2024-01-01

**Supporting information for the manuscript:**

**Transient crystallisation of rare earth carbonates during the  
hydrothermal oxidation of siderite**

Maddin, M.\*<sup>1</sup>, Rateau, R.<sup>1</sup>, Szucs, A.M.<sup>1</sup>, Terribili, L.<sup>1</sup>, and Rodriguez-Blanco, J.D.<sup>2</sup>

<sup>1</sup> Department of Geology, School of Natural Sciences, Trinity College Dublin, Dublin 2, Ireland

<sup>2</sup>iCRAG, Department of Geology, School of natural Sciences, Trinity College Dublin, Dublin 2, Ireland

**Figure SI-1.** A preferential uptake of Nd and La with Ce in the PAAS solution was observed at 165 °C after 24 hours.

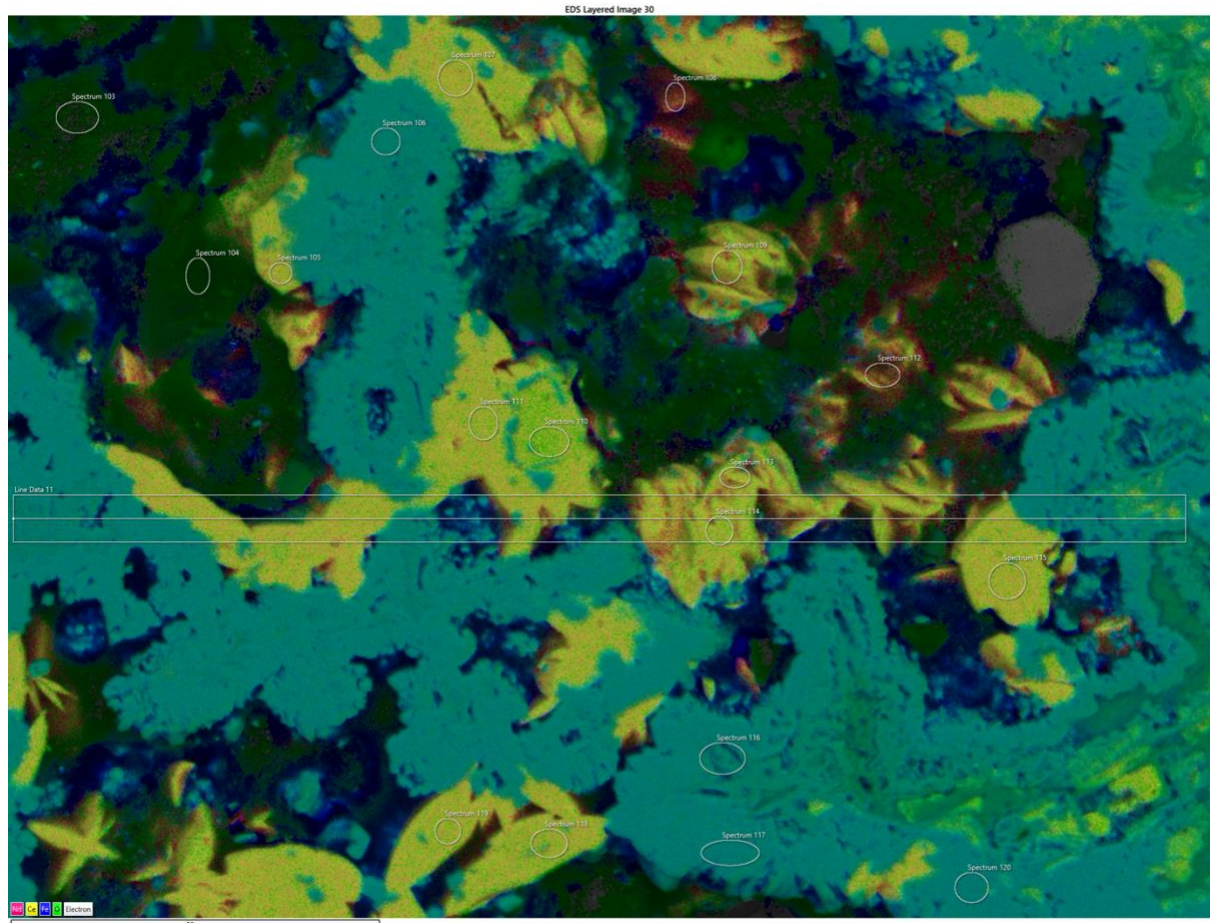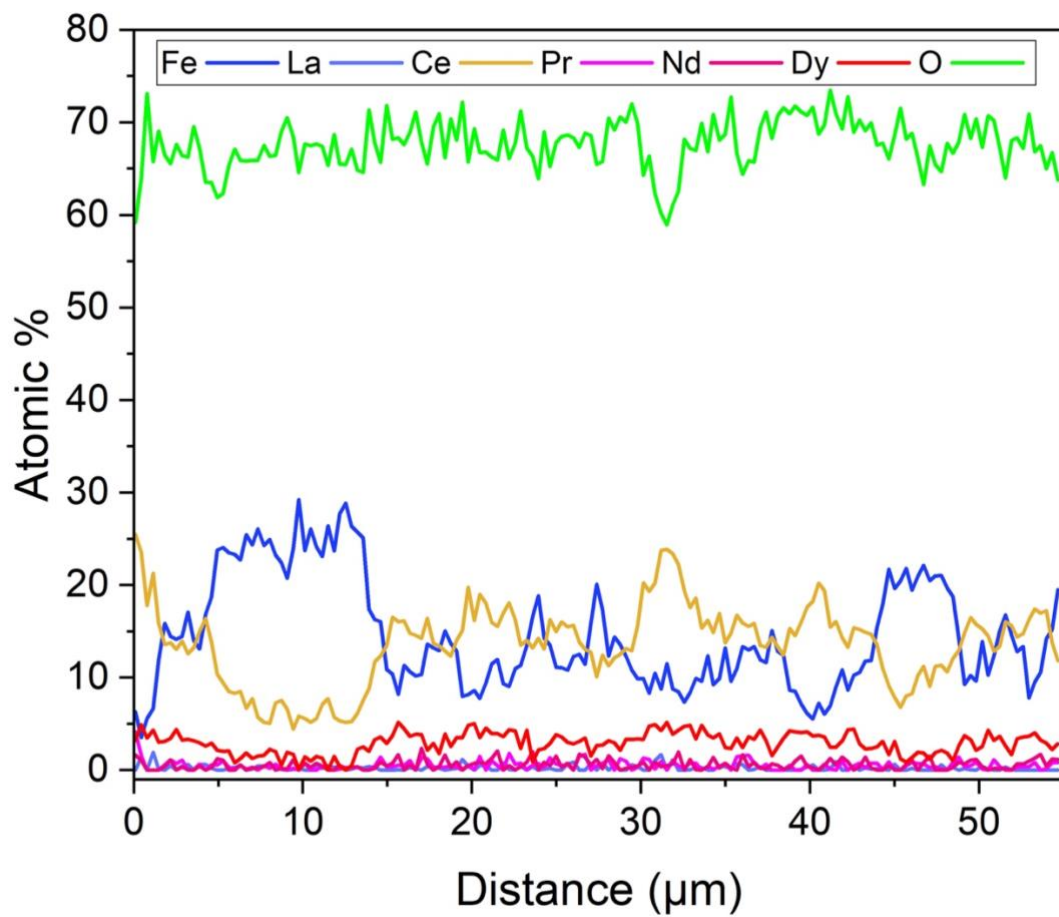

| PAAS 165 °C 24 hrs | C     | O     | Fe    | La   | Ce    | Pr   | Nd   | Dy   | Total  |
|--------------------|-------|-------|-------|------|-------|------|------|------|--------|
| Spectrum 103       | 0.00  | 75.27 | 23.87 | 0.08 | 0.76  | 0.00 | 0.00 | 0.20 | 100.00 |
| Spectrum 104       | 29.68 | 59.36 | 9.15  | 0.29 | 0.89  | 0.19 | 0.40 | 0.03 | 100.00 |
| Spectrum 105       | 28.86 | 57.73 | 1.64  | 2.14 | 5.86  | 0.69 | 2.78 | 0.30 | 100.00 |
| Spectrum 106       | 25.13 | 50.25 | 23.85 | 0.14 | 0.37  | 0.05 | 0.19 | 0.01 | 100.00 |
| Spectrum 107       | 28.93 | 57.86 | 0.95  | 2.34 | 6.14  | 0.69 | 2.77 | 0.32 | 100.00 |
| Spectrum 108       | 17.07 | 34.14 | 12.82 | 6.22 | 17.89 | 2.23 | 8.72 | 0.90 | 100.00 |
| Spectrum 109       | 28.35 | 56.70 | 1.37  | 2.56 | 6.76  | 0.80 | 3.11 | 0.35 | 100.00 |
| Spectrum 110       | 29.09 | 58.18 | 1.03  | 3.60 | 5.43  | 0.48 | 1.94 | 0.25 | 100.00 |
| Spectrum 111       | 28.98 | 57.96 | 0.99  | 2.68 | 6.02  | 0.56 | 2.50 | 0.32 | 100.00 |
| Spectrum 112       | 22.43 | 44.85 | 6.66  | 4.85 | 13.09 | 1.48 | 6.04 | 0.61 | 100.00 |
| Spectrum 113       | 28.47 | 56.93 | 1.68  | 2.40 | 6.43  | 0.77 | 3.01 | 0.31 | 100.00 |
| Spectrum 114       | 29.01 | 58.03 | 0.64  | 2.67 | 6.11  | 0.67 | 2.54 | 0.32 | 100.00 |
| Spectrum 115       | 28.93 | 57.86 | 0.73  | 2.59 | 6.23  | 0.64 | 2.69 | 0.33 | 100.00 |
| Spectrum 116       | 24.66 | 49.32 | 25.46 | 0.13 | 0.29  | 0.04 | 0.08 | 0.03 | 100.00 |
| Spectrum 117       | 24.82 | 49.64 | 25.18 | 0.07 | 0.18  | 0.02 | 0.07 | 0.02 | 100.00 |
| Spectrum 118       | 28.83 | 57.66 | 2.02  | 2.47 | 5.63  | 0.59 | 2.47 | 0.33 | 100.00 |
| Spectrum 119       | 29.07 | 58.14 | 0.61  | 2.62 | 6.03  | 0.61 | 2.61 | 0.32 | 100.00 |
| Spectrum 120       | 24.83 | 49.67 | 24.87 | 0.11 | 0.30  | 0.05 | 0.13 | 0.04 | 100.00 |

**Figure SI-2.** Dy incorporation into cerianite in the PAAS solution at 205 °C after 1 week and in the non-PAAS solution at 205 °C after 24 hours

### EDS Layered Image 13

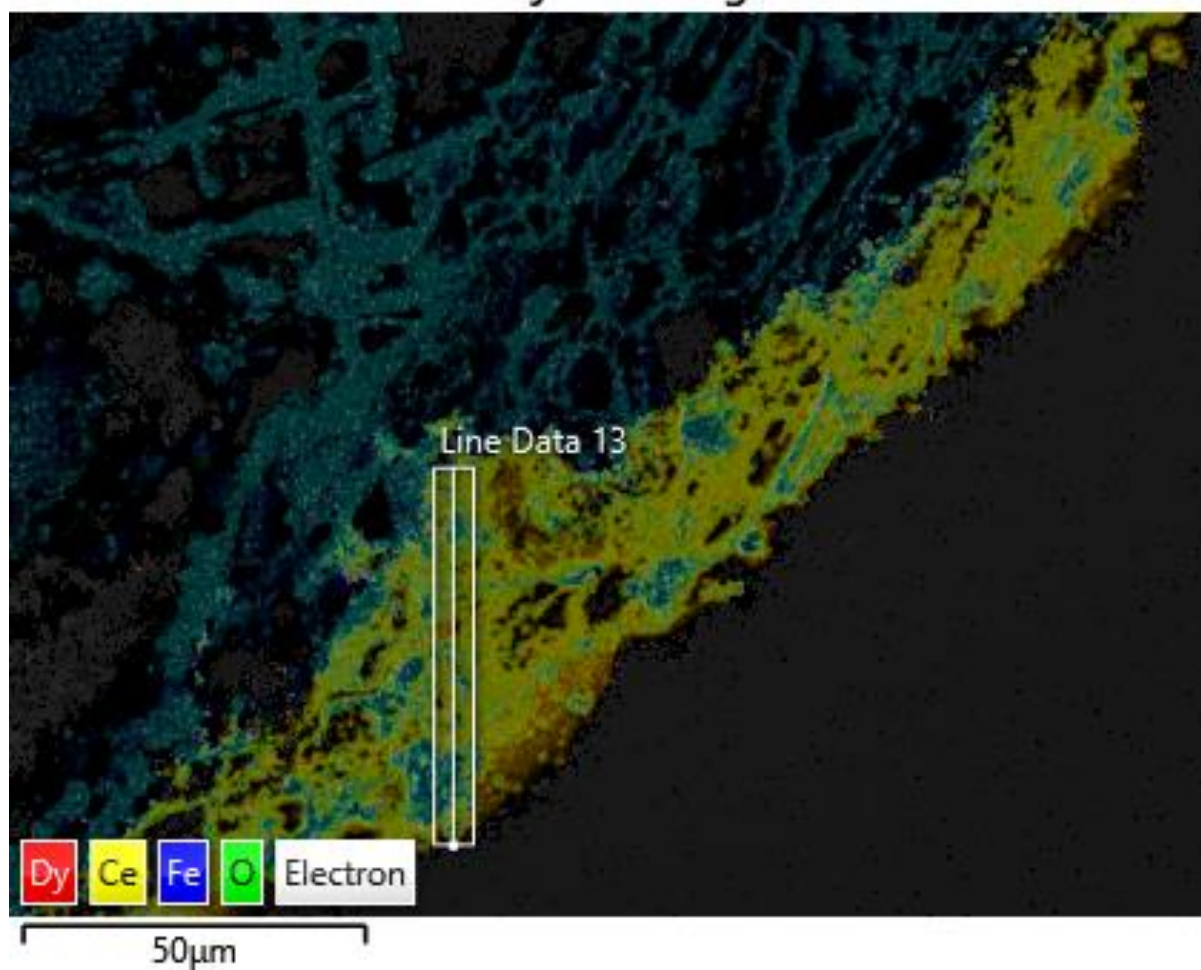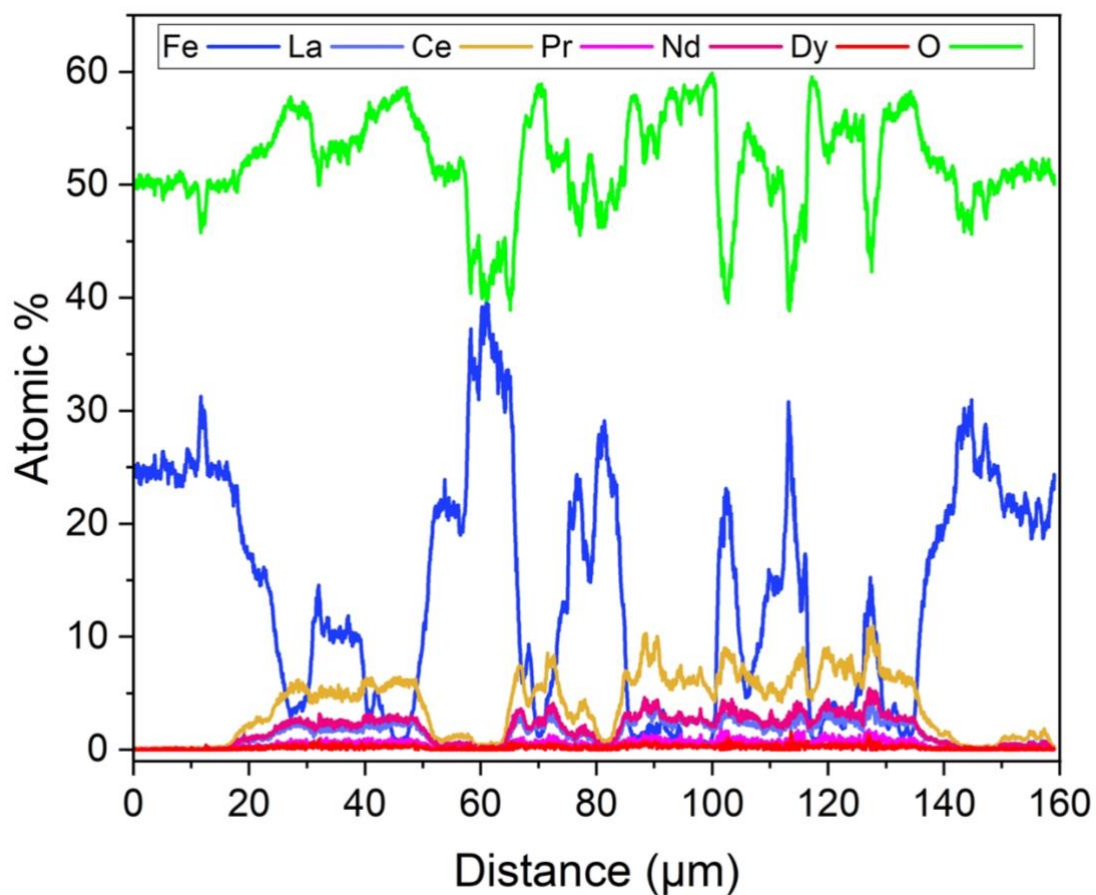

**Figure SI-3.** Dy incorporation into cerianite in the equal concentration solution at 205 °C after 24 hours, REE concentration in the iron oxides was below the SEM-EDS detection limit, at <0.1%

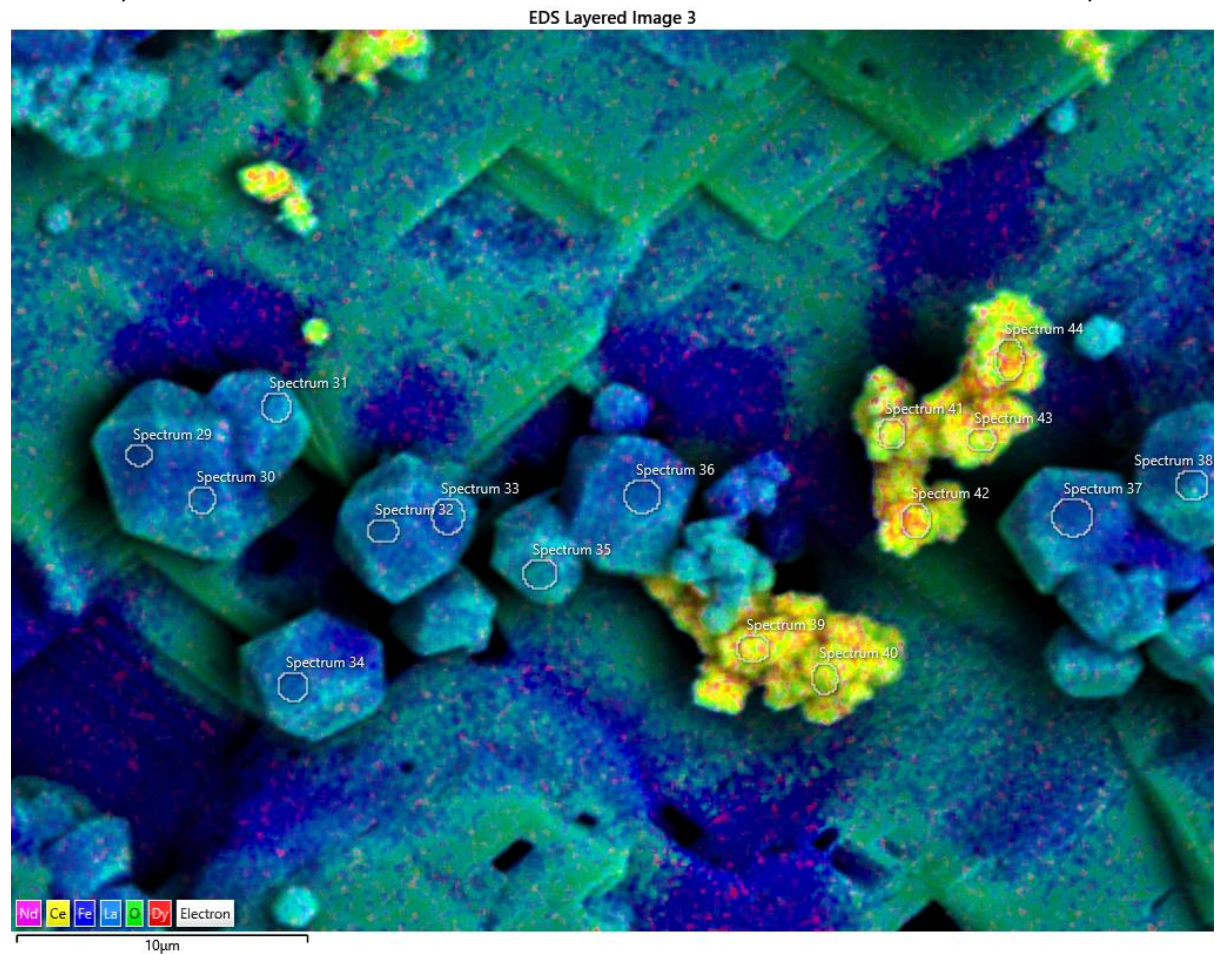

| Equal Conc. 205 °C 24 hrs | C     | O     | Fe    | La   | Ce    | Pr   | Nd   | Dy   | Total  |
|---------------------------|-------|-------|-------|------|-------|------|------|------|--------|
| Spectrum 29               | 18.48 | 36.96 | 44.64 | 0.00 | 0.06  | 0.05 | 0.00 | 0.00 | 100.00 |
| Spectrum 30               | 19.53 | 39.06 | 41.21 | 0.10 | 0.05  | 0.08 | 0.04 | 0.00 | 100.00 |
| Spectrum 31               | 20.30 | 40.60 | 38.92 | 0.01 | 0.11  | 0.02 | 0.00 | 0.04 | 100.00 |
| Spectrum 32               | 19.77 | 39.54 | 40.37 | 0.01 | 0.14  | 0.04 | 0.00 | 0.15 | 100.00 |
| Spectrum 33               | 18.74 | 37.47 | 43.31 | 0.03 | 0.08  | 0.00 | 0.02 | 0.39 | 100.00 |
| Spectrum 34               | 19.25 | 38.49 | 42.21 | 0.06 | 0.14  | 0.02 | 0.04 | 0.00 | 100.00 |
| Spectrum 35               | 22.89 | 45.79 | 30.91 | 0.00 | 0.22  | 0.12 | 0.02 | 0.09 | 100.00 |
| Spectrum 36               | 18.84 | 37.68 | 43.26 | 0.05 | 0.33  | 0.07 | 0.00 | 0.00 | 100.00 |
| Spectrum 37               | 18.59 | 37.17 | 43.90 | 0.00 | 0.40  | 0.09 | 0.03 | 0.00 | 100.00 |
| Spectrum 38               | 20.87 | 41.73 | 36.86 | 0.06 | 0.31  | 0.09 | 0.00 | 0.13 | 100.00 |
| Spectrum 39               | 24.39 | 48.78 | 11.84 | 0.00 | 11.49 | 0.57 | 0.64 | 2.48 | 100.00 |
| Spectrum 40               | 24.29 | 48.58 | 14.21 | 0.03 | 10.11 | 0.13 | 0.21 | 2.44 | 100.00 |
| Spectrum 41               | 23.68 | 47.36 | 15.76 | 0.13 | 9.83  | 0.64 | 0.55 | 2.06 | 100.00 |
| Spectrum 42               | 21.08 | 42.17 | 16.23 | 0.40 | 16.14 | 0.04 | 0.38 | 3.56 | 100.00 |
| Spectrum 43               | 22.61 | 45.21 | 17.30 | 0.29 | 11.33 | 0.22 | 0.35 | 2.70 | 100.00 |
| Spectrum 44               | 21.36 | 42.72 | 18.61 | 0.00 | 14.05 | 0.28 | 0.25 | 2.95 | 100.00 |

**Figure SI-4.** In the equal concentration experiments (A), the uptake of REEs by the crystallising carbonate occurs in the same ratio as their composition in the aqueous solution, indicating that the crystallising carbonate mirrors the REE composition of the surrounding solution. Conversely, in the PAAS solution experiments (B), the REE ratio is different compared to the equal concentration, but still reflects the higher concentration of La, Ce and Nd in the original solution.

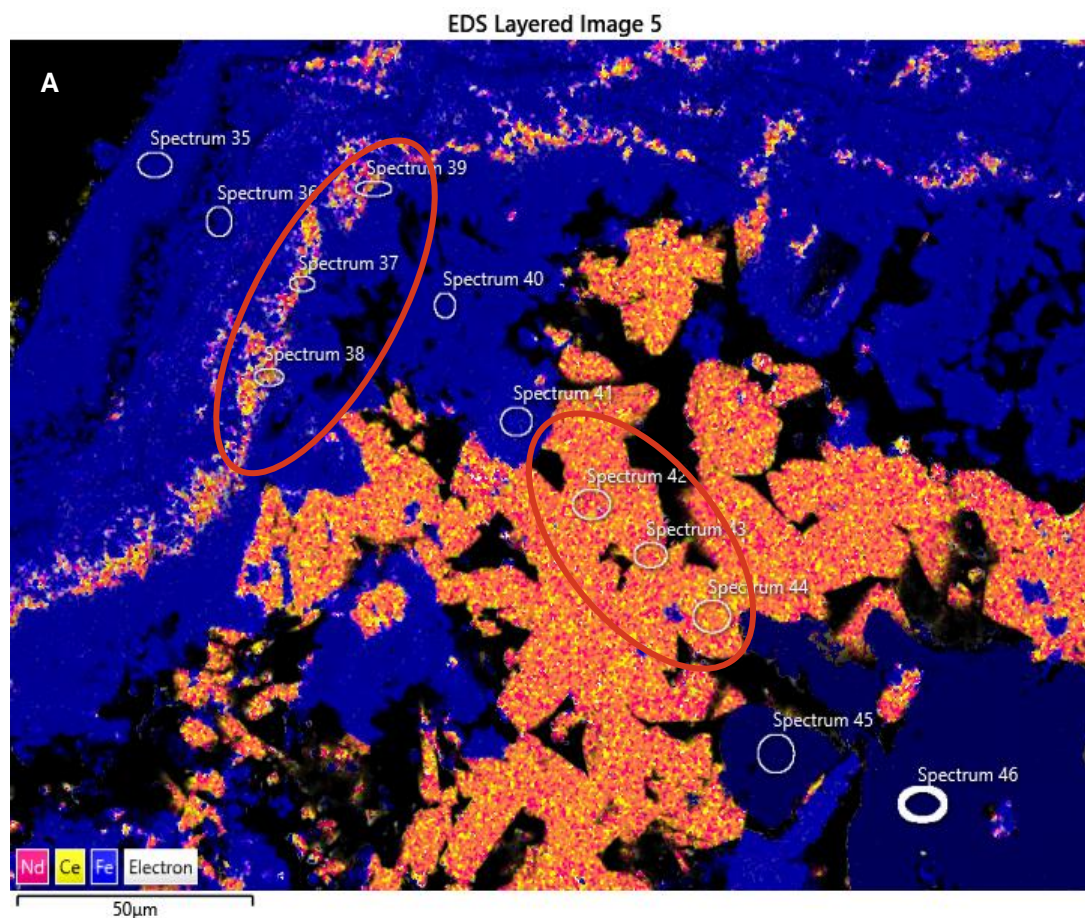

| A. Equal Conc. 165<br>°C 24 hrs | O     | Fe    | La   | Ce   | Pr   | Nd   | Dy   | Total  |
|---------------------------------|-------|-------|------|------|------|------|------|--------|
| Spectrum 35                     | 60.68 | 39.11 | 0.00 | 0.12 | 0.08 | 0.10 | 0.00 | 100.00 |
| Spectrum 36                     | 61.95 | 36.94 | 0.19 | 0.21 | 0.21 | 0.15 | 0.34 | 100.00 |
| Spectrum 37                     | 69.73 | 22.60 | 1.37 | 1.02 | 1.21 | 1.57 | 2.50 | 100.00 |
| Spectrum 38                     | 70.56 | 18.75 | 1.91 | 2.91 | 2.47 | 2.22 | 1.18 | 100.00 |
| Spectrum 39                     | 66.27 | 27.92 | 0.82 | 1.04 | 1.17 | 1.27 | 1.50 | 100.00 |
| Spectrum 40                     | 60.89 | 39.07 | 0.14 | 0.14 | 0.00 | 0.05 | 0.00 | 100.00 |
| Spectrum 41                     | 64.08 | 33.32 | 0.28 | 0.53 | 0.46 | 0.38 | 0.95 | 100.00 |
| Spectrum 42                     | 77.41 | 3.16  | 4.22 | 3.52 | 3.95 | 4.42 | 3.33 | 100.00 |
| Spectrum 43                     | 78.47 | 1.00  | 4.04 | 3.78 | 5.16 | 4.80 | 2.75 | 100.00 |
| Spectrum 44                     | 78.89 | 0.65  | 4.38 | 4.13 | 5.04 | 4.42 | 2.49 | 100.00 |
| Spectrum 45                     | 71.56 | 28.27 | 0.03 | 0.10 | 0.01 | 0.00 | 0.12 | 100.00 |
| Spectrum 46                     | 71.25 | 28.59 | 0.04 | 0.14 | 0.03 | 0.00 | 0.04 | 100.00 |

### EDS Layered Image 30

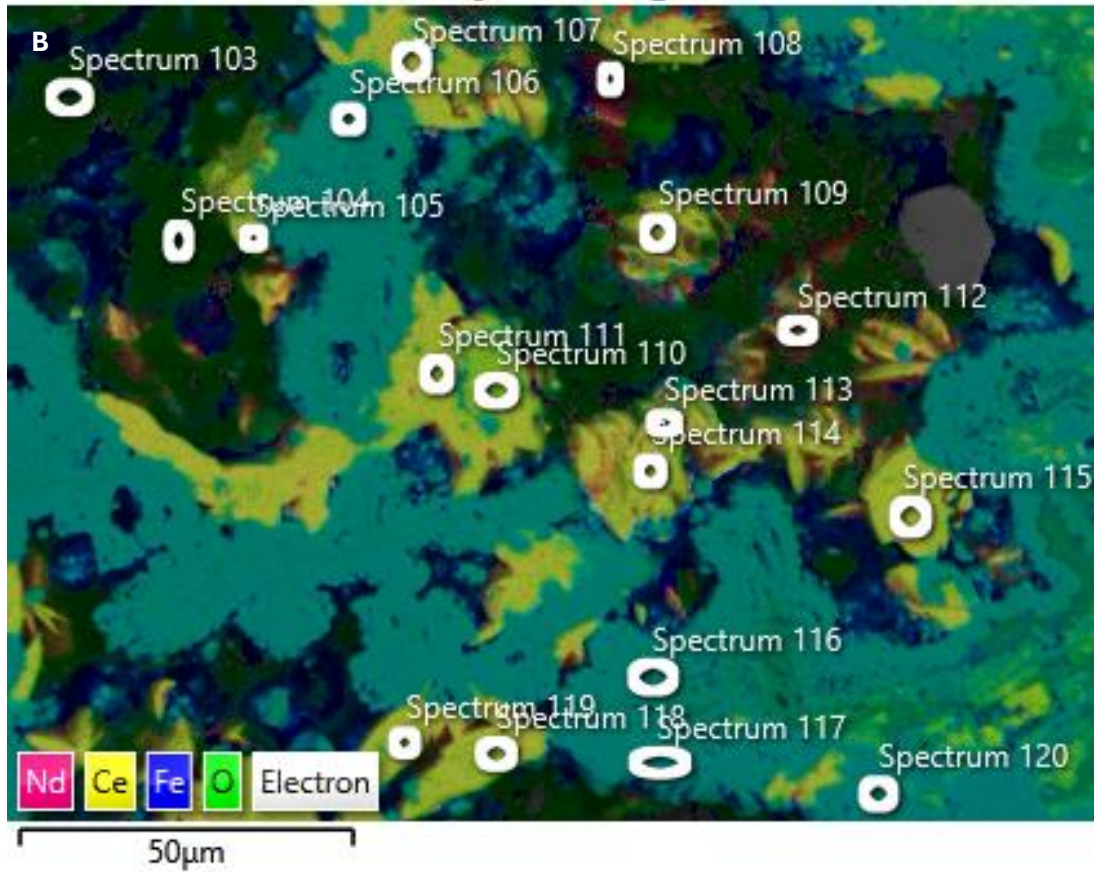

| B. PAAS 165 °C 24 hrs | C     | O     | Fe    | La   | Ce    | Pr   | Nd   | Dy   | Total  |
|-----------------------|-------|-------|-------|------|-------|------|------|------|--------|
| Spectrum 103          | 0.00  | 75.27 | 23.87 | 0.08 | 0.76  | 0.00 | 0.00 | 0.20 | 100.00 |
| Spectrum 104          | 29.68 | 59.36 | 9.15  | 0.29 | 0.89  | 0.19 | 0.40 | 0.03 | 100.00 |
| Spectrum 105          | 28.86 | 57.73 | 1.64  | 2.14 | 5.86  | 0.69 | 2.78 | 0.30 | 100.00 |
| Spectrum 106          | 25.13 | 50.25 | 23.85 | 0.14 | 0.37  | 0.05 | 0.19 | 0.01 | 100.00 |
| Spectrum 107          | 28.93 | 57.86 | 0.95  | 2.34 | 6.14  | 0.69 | 2.77 | 0.32 | 100.00 |
| Spectrum 108          | 17.07 | 34.14 | 12.82 | 6.22 | 17.89 | 2.23 | 8.72 | 0.90 | 100.00 |
| Spectrum 109          | 28.35 | 56.70 | 1.37  | 2.56 | 6.76  | 0.80 | 3.11 | 0.35 | 100.00 |
| Spectrum 110          | 29.09 | 58.18 | 1.03  | 3.60 | 5.43  | 0.48 | 1.94 | 0.25 | 100.00 |
| Spectrum 111          | 28.98 | 57.96 | 0.99  | 2.68 | 6.02  | 0.56 | 2.50 | 0.32 | 100.00 |
| Spectrum 112          | 22.43 | 44.85 | 6.66  | 4.85 | 13.09 | 1.48 | 6.04 | 0.61 | 100.00 |
| Spectrum 113          | 28.47 | 56.93 | 1.68  | 2.40 | 6.43  | 0.77 | 3.01 | 0.31 | 100.00 |
| Spectrum 114          | 29.01 | 58.03 | 0.64  | 2.67 | 6.11  | 0.67 | 2.54 | 0.32 | 100.00 |
| Spectrum 115          | 28.93 | 57.86 | 0.73  | 2.59 | 6.23  | 0.64 | 2.69 | 0.33 | 100.00 |
| Spectrum 116          | 24.66 | 49.32 | 25.46 | 0.13 | 0.29  | 0.04 | 0.08 | 0.03 | 100.00 |
| Spectrum 117          | 24.82 | 49.64 | 25.18 | 0.07 | 0.18  | 0.02 | 0.07 | 0.02 | 100.00 |
| Spectrum 118          | 28.83 | 57.66 | 2.02  | 2.47 | 5.63  | 0.59 | 2.47 | 0.33 | 100.00 |
| Spectrum 119          | 29.07 | 58.14 | 0.61  | 2.62 | 6.03  | 0.61 | 2.61 | 0.32 | 100.00 |
| Spectrum 120          | 24.83 | 49.67 | 24.87 | 0.11 | 0.30  | 0.05 | 0.13 | 0.04 | 100.00 |

**Figure SI-5.** Powder XRD patterns of goethite (G) in the equal concentration (non-PAAS) and PAAS experiments at 50 °C after 24 hours and 8 weeks (\*Bragg peaks that have not been assigned to any phase correspond to siderite). The diagram in the bottom area shows the standard XRD patterns of the phases found in these experiments.

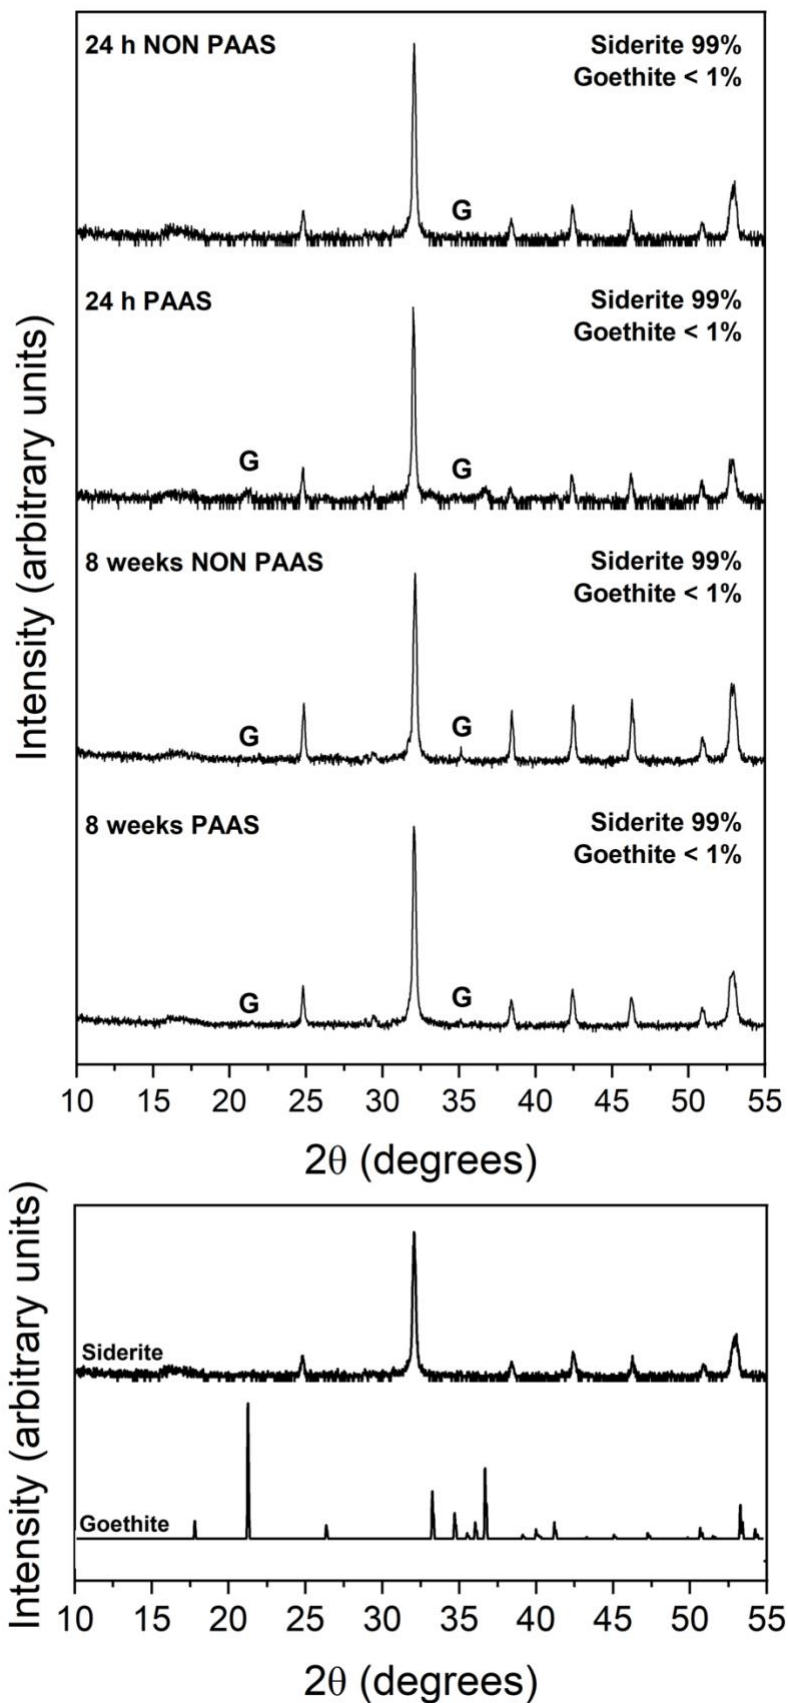



**Figure SI-6.** Powder XRD patterns of goethite (G), hematite (H), kozoite (K), hydroxylbastnasite (B) and cerianite (C) in the equal concentration (non-PAAS) and PAAS experiments at 165 °C after 24 hours and 2 weeks (\*Bragg peaks that have not been assigned to any phase correspond to siderite) The diagram in the right area shows the standard XRD patterns of the phases found in these experiments.

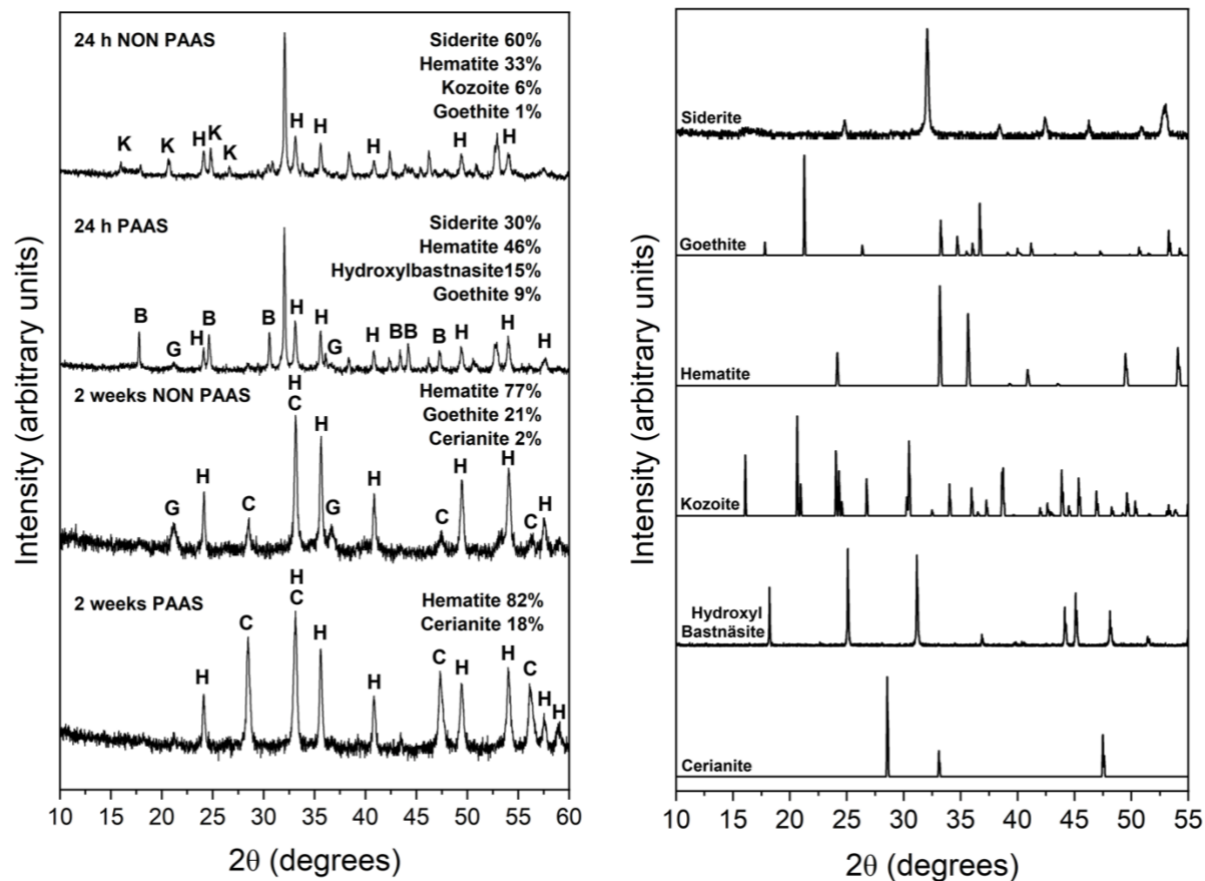

**Figure SI-7.** Powder XRD patterns of, hematite (H), hydroxylbastnasite (B) and cerianite (C) in the equal concentration (non-PAAS) and PAAS experiments at 205 °C after 24 hours (\*Bragg peaks that have not been assigned to any phase correspond to siderite). The diagram in the bottom area shows the standard XRD patterns of the phases found in these experiments.

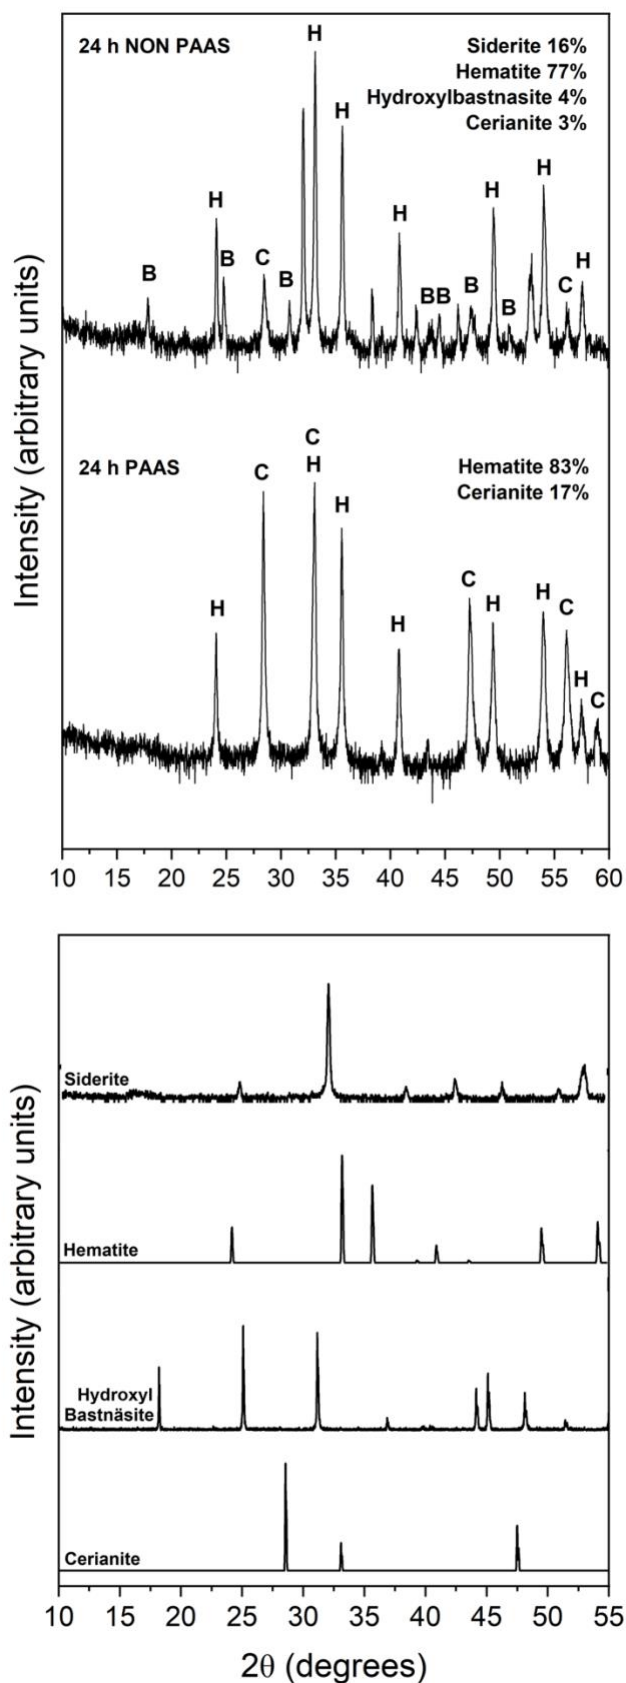

Supplement: d4ra05212a1.pdf [file d4ra05212a1.pdf]
